# Supplementary material for: Transformation of Combustion Nanocatalysts inside Solid Rocket Motor under Various Pressures
Source: PubMed Central journal article supplement (PMC6473950; doi:10.3390/nano9030381), 2019-03-06
Supplement: nanomaterials-09-00381-s001.pdf [file nanomaterials-09-00381-s001.pdf]

## Supplementary Materials

# Transformation of Combustion Nanocatalysts inside Solid Rocket Motor under Various Pressures

Jun-Qiang Li <sup>1,†</sup>, Linlin Liu <sup>2,†</sup>, Xiaolong Fu <sup>1</sup>, Deyun Tang <sup>2</sup>, Yin Wang <sup>2</sup>, Songqi Hu <sup>2</sup> and Qi-Long Yan <sup>2,\*</sup>

<sup>1</sup> Xi'an Modern Chemistry Research Institute, Xi'an 710065, China; llijq@sohu.com (J.-Q.L.); fuxiaolong204@163.com (X.F.)

<sup>2</sup> Science and Technology on Combustion, Internal Flow and Thermo-structure Laboratory, Northwestern Polytechnical University, Xi'an 710072, China; ll@nwpu.edu.cn (L.L.); tangdy@mail.nwpu.edu.cn (D.T.); wongyin@mail.nwpu.edu.cn (Y.W.); pinecore@nwpu.edu.cn (S.H.)

<sup>†</sup> These authors contribute equally to this work.

\* Correspondence: qilongyan@nwpu.edu.cn

### Characterizations

The surface morphology and microstructure of the condensed combustion products were examined by means of scanning electron microscopy (SEM). The SEM analysis was operated on a Quanta FEG 250, with an accelerating voltage 15 or 20 kV. Meanwhile, the products have to be coated by gold to get better electron conductivity. The field emission SEM is coupled with an accessory Energy Dispersive Spectrometer (EDS), through which we can get the element distribution information of the condensed products. More detailed compositions and structure information can be obtained by Transmission electron microscopy (TEM). The TEM analysis was operated on a Tecnai G2 F20, by which the target samples were dispersed in ethanol, so that they can achieve a maximum magnification of 1 million times at an accelerating voltage of 200 kV. A laser particle size analyzer (Kurt LS13320) was used to measure the particle size distribution of the involved combustion products. The compositions of the samples and the crystal phases of the elements were characterized by powder X-ray diffraction (XRD, Panaco Sharp Xpert Pro MPD; Bruker C2 Discover with GADDS, operating at 40 kV and 40mA with unfiltered Cu Ka radiation, E1/48049 eV, k1/41.5406 Å).

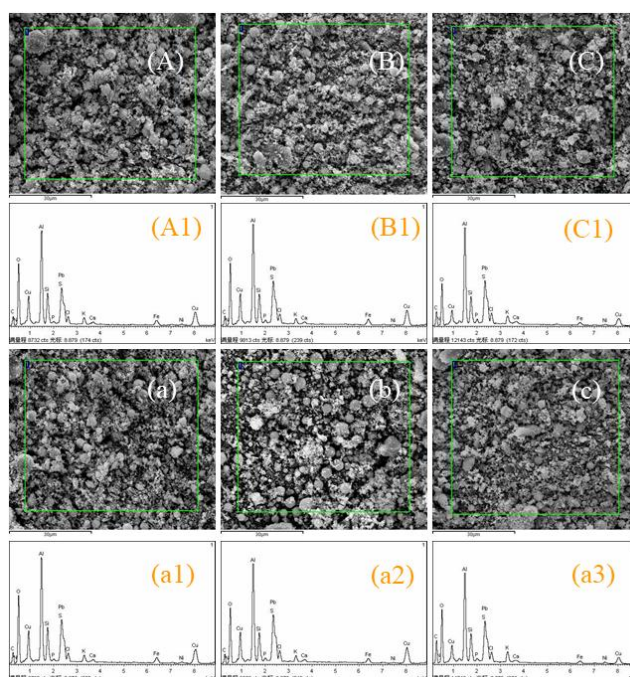

Figure S1. The EDS spectra of CCPs from JZ propellant grains.

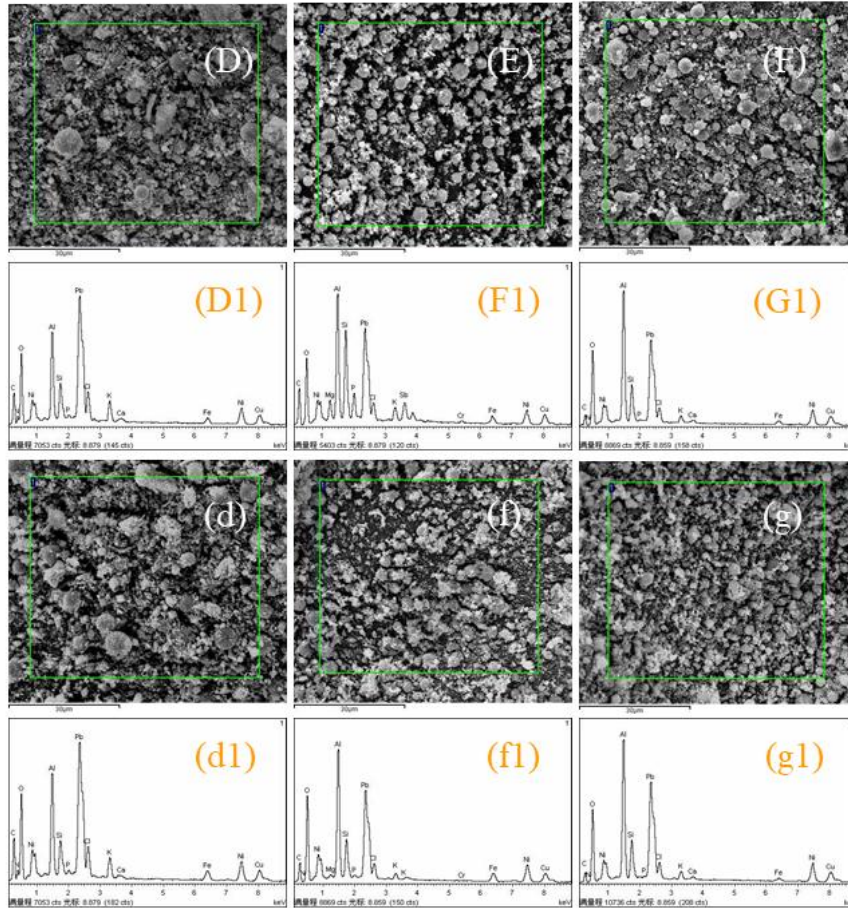

Figure S2. The EDS spectra of CCPs from LZ propellant grains.

Table S1. Element distribution results of JZ and LZ propellant grains combustion products.

| Samples | Element | Test 1                |                   |                           |                 | Test 2                |                   |                           |                 |
|---------|---------|-----------------------|-------------------|---------------------------|-----------------|-----------------------|-------------------|---------------------------|-----------------|
|         |         | Element concentration | Weight Percentage | Weight Percentage (Sigma) | atom Percentage | Element concentration | Weight Percentage | Weight Percentage (Sigma) | atom Percentage |
| JZ-15   | C K     | 6.27                  | 0.3789            | 1.10                      | 29.56           | 6.82                  | 0.3808            | 1.06                      | 30.98           |
|         | N K     | 0.37                  | 0.1636            | 0.89                      | 3.42            | 0.36                  | 0.1615            | 0.88                      | 3.33            |
|         | O K     | 23.40                 | 0.7110            | 0.61                      | 44.14           | 23.48                 | 0.7040            | 0.59                      | 43.34           |
|         | Al K    | 9.04                  | 0.7491            | 0.23                      | 9.60            | 9.29                  | 0.7544            | 0.22                      | 9.49            |
|         | Si K    | 3.21                  | 0.7492            | 0.11                      | 3.27            | 3.21                  | 0.7532            | 0.10                      | 3.15            |
|         | P K     | 0.42                  | 1.1293            | 0.05                      | 0.26            | 0.38                  | 1.1353            | 0.05                      | 0.23            |
|         | S K     | 1.37                  | 0.8614            | 0.10                      | 1.06            | 1.52                  | 0.8644            | 0.10                      | 1.14            |
|         | Cl K    | 0.79                  | 0.6965            | 0.07                      | 0.69            | 0.83                  | 0.6958            | 0.06                      | 0.70            |
|         | K K     | 1.33                  | 0.9784            | 0.06                      | 0.75            | 1.13                  | 0.9768            | 0.06                      | 0.61            |
|         | Ca K    | 0.42                  | 0.9487            | 0.05                      | 0.24            | 0.42                  | 0.9481            | 0.05                      | 0.23            |
|         | Fe K    | 2.29                  | 0.8912            | 0.11                      | 0.99            | 2.38                  | 0.8890            | 0.11                      | 1.00            |
|         | Ni K    | 0.71                  | 0.8807            | 0.12                      | 0.30            | 0.61                  | 0.8797            | 0.11                      | 0.25            |
|         | Cu K    | 10.99                 | 0.8403            | 0.32                      | 4.42            | 10.84                 | 0.8393            | 0.30                      | 4.23            |
| Pb M    | 9.91    | 0.7794                | 0.37              | 1.32                      | 10.38           | 0.7819                | 0.36              | 1.33                      |                 |
| JZ-20   | C K     | 5.58                  | 16.18             | 1.03                      | 30.23           | 6.45                  | 16.67             | 1.01                      | 31.94           |
|         | N K     | 0.28                  | 1.86              | 0.82                      | 2.98            | 0.24                  | 1.42              | 0.82                      | 2.33            |
|         | O K     | 20.19                 | 30.57             | 0.55                      | 42.89           | 20.73                 | 28.35             | 0.52                      | 40.79           |
|         | Al K    | 8.41                  | 12.08             | 0.22                      | 10.05           | 9.58                  | 12.09             | 0.22                      | 10.31           |
|         | Si K    | 2.66                  | 3.82              | 0.10                      | 3.05            | 2.96                  | 3.73              | 0.09                      | 3.06            |
|         | P K     | 0.47                  | 0.45              | 0.05                      | 0.33            | 0.56                  | 0.46              | 0.05                      | 0.34            |
|         | S K     | 1.37                  | 1.70              | 0.10                      | 1.19            | 1.69                  | 1.85              | 0.10                      | 1.32            |

|       |      |       |       |      |       |       |       |      |       |
|-------|------|-------|-------|------|-------|-------|-------|------|-------|
|       | Cl K | 0.95  | 1.47  | 0.07 | 0.93  | 1.23  | 1.70  | 0.07 | 1.11  |
|       | K K  | 0.92  | 1.01  | 0.05 | 0.58  | 1.14  | 1.11  | 0.06 | 0.66  |
|       | Ca K | 0.34  | 0.38  | 0.05 | 0.21  | 0.38  | 0.38  | 0.05 | 0.22  |
|       | Fe K | 2.11  | 2.53  | 0.11 | 1.02  | 1.91  | 2.02  | 0.10 | 0.83  |
|       | Ni K | 0.45  | 0.54  | 0.10 | 0.21  | 0.54  | 0.57  | 0.10 | 0.22  |
|       | Cu K | 10.82 | 13.74 | 0.30 | 4.85  | 12.80 | 14.23 | 0.31 | 5.15  |
|       | Pb M | 9.94  | 13.66 | 0.36 | 1.48  | 12.77 | 15.42 | 0.38 | 1.71  |
|       | C K  | 11.67 | 24.75 | 0.93 | 42.36 | 21.02 | 30.07 | 0.73 | 46.50 |
|       | N K  | 0.38  | 2.36  | 0.95 | 3.47  | 0.58  | 3.02  | 0.90 | 4.00  |
|       | O K  | 18.85 | 26.94 | 0.51 | 34.61 | 26.47 | 30.34 | 0.48 | 35.22 |
|       | Al K | 11.18 | 11.71 | 0.21 | 8.92  | 11.31 | 9.11  | 0.14 | 6.27  |
|       | Si K | 3.32  | 3.56  | 0.09 | 2.61  | 3.76  | 3.03  | 0.07 | 2.01  |
|       | P K  | 0.83  | 0.59  | 0.05 | 0.39  | 0.63  | 0.34  | 0.03 | 0.20  |
| JZ-25 | S K  | 1.57  | 1.51  | 0.09 | 0.97  | 2.00  | 1.47  | 0.07 | 0.85  |
|       | Cl K | 1.45  | 1.80  | 0.07 | 1.04  | 1.38  | 1.28  | 0.05 | 0.67  |
|       | K K  | 1.69  | 1.51  | 0.06 | 0.79  | 2.53  | 1.71  | 0.05 | 0.81  |
|       | Ca K | 0.49  | 0.45  | 0.05 | 0.23  | 0.44  | 0.31  | 0.03 | 0.15  |
|       | Fe K | 1.32  | 1.30  | 0.08 | 0.48  | 1.34  | 1.04  | 0.06 | 0.35  |
|       | Ni K | 0.81  | 0.80  | 0.10 | 0.28  | 1.24  | 0.96  | 0.08 | 0.30  |
|       | Cu K | 6.93  | 7.13  | 0.21 | 2.31  | 6.75  | 5.49  | 0.15 | 1.61  |
|       | Pb M | 14.58 | 15.58 | 0.37 | 1.55  | 14.51 | 11.83 | 0.27 | 1.06  |
|       | C K  | 12.52 | 21.23 | 0.88 | 39.09 | 14.02 | 23.35 | 0.82 | 41.17 |
|       | N K  | 1.62  | 8.81  | 0.96 | 13.91 | 1.62  | 9.05  | 0.93 | 13.68 |
|       | O K  | 14.87 | 22.75 | 0.48 | 31.45 | 15.06 | 23.48 | 0.46 | 31.09 |
|       | Al K | 4.79  | 5.23  | 0.11 | 4.28  | 4.61  | 5.13  | 0.10 | 4.03  |
|       | Si K | 2.13  | 2.15  | 0.07 | 1.69  | 1.69  | 1.75  | 0.06 | 1.32  |
|       | P K  | 0.38  | 0.25  | 0.04 | 0.18  | 0.38  | 0.26  | 0.04 | 0.18  |
| LZ-7  | Cl K | 1.77  | 2.21  | 0.08 | 1.38  | 1.55  | 1.94  | 0.07 | 1.16  |
|       | K K  | 2.16  | 1.94  | 0.07 | 1.09  | 1.80  | 1.62  | 0.06 | 0.88  |
|       | Ca K | 0.35  | 0.32  | 0.05 | 0.18  | 0.18  | 0.16  | 0.04 | 0.09  |
|       | Fe K | 1.48  | 1.42  | 0.09 | 0.56  | 2.02  | 1.98  | 0.09 | 0.75  |
|       | Ni K | 6.09  | 5.81  | 0.18 | 2.19  | 6.02  | 5.89  | 0.16 | 2.13  |
|       | Cu K | 4.20  | 4.19  | 0.18 | 1.46  | 3.99  | 4.09  | 0.16 | 1.36  |
|       | Pb M | 23.28 | 23.68 | 0.46 | 2.53  | 20.57 | 21.30 | 0.40 | 2.18  |
|       | C K  | 10.03 | 26.05 | 0.79 | 49.22 | 8.67  | 18.11 | 0.66 | 35.44 |
|       | N K  | 3.03  | 4.62  | 0.18 | 0.86  | 0.24  | 1.29  | 0.48 | 2.16  |
|       | O K  | 11.30 | 19.92 | 0.41 | 28.25 | 21.42 | 27.88 | 0.40 | 40.95 |
|       | Mg K | 0.87  | 1.45  | 0.07 | 1.35  | 0.19  | 0.27  | 0.05 | 0.26  |
|       | Al K | 5.24  | 7.58  | 0.14 | 6.37  | 8.25  | 9.90  | 0.14 | 8.62  |
|       | Si K | 3.97  | 5.47  | 0.11 | 4.42  | 2.67  | 3.12  | 0.08 | 2.61  |
|       | P K  | 2.01  | 1.88  | 0.08 | 1.38  | 0.35  | 0.26  | 0.05 | 0.20  |
| LZ-18 | Cl K | 0.81  | 1.33  | 0.08 | 0.85  | 1.02  | 1.38  | 0.07 | 0.92  |
|       | K K  | 1.15  | 1.33  | 0.07 | 0.77  | 0.72  | 0.69  | 0.05 | 0.42  |
|       | Cr K | 0.29  | 0.38  | 0.08 | 0.17  | 0.07  | 0.07  | 0.06 | 0.03  |
|       | Fe K | 1.37  | 1.73  | 0.11 | 0.70  | 2.38  | 2.41  | 0.10 | 1.01  |
|       | Ni K | 3.96  | 4.97  | 0.18 | 1.92  | 7.63  | 7.74  | 0.18 | 3.10  |
|       | Cu K | 3.63  | 4.75  | 0.20 | 1.70  | 4.52  | 4.79  | 0.18 | 1.77  |
|       | Pb M | 13.19 | 18.54 | 0.38 | 2.03  | 19.50 | 22.09 | 0.35 | 2.51  |
|       | C K  | 4.92  | 12.39 | 1.05 | 26.48 | 4.93  | 11.38 | 0.90 | 25.67 |
|       | N K  | 0.24  | 1.36  | 0.81 | 2.49  | 0.22  | 1.11  | 0.69 | 2.16  |
|       | O K  | 19.54 | 27.80 | 0.52 | 44.61 | 19.74 | 25.65 | 0.43 | 43.43 |
| LZ-35 | Al K | 8.93  | 12.00 | 0.22 | 11.42 | 9.84  | 12.13 | 0.19 | 12.18 |
|       | Si K | 2.74  | 3.64  | 0.10 | 3.33  | 2.98  | 3.62  | 0.09 | 3.49  |
|       | P K  | 0.17  | 0.15  | 0.05 | 0.12  | 0.17  | 0.14  | 0.05 | 0.12  |
|       | Cl K | 1.04  | 1.61  | 0.08 | 1.17  | 1.09  | 1.56  | 0.08 | 1.19  |
|       | K K  | 0.91  | 0.98  | 0.06 | 0.65  | 1.09  | 1.09  | 0.06 | 0.75  |

|      |       |       |      |      |       |       |      |      |
|------|-------|-------|------|------|-------|-------|------|------|
| Ca K | 0.38  | 0.42  | 0.05 | 0.27 | 0.36  | 0.36  | 0.05 | 0.25 |
| Fe K | 1.15  | 1.29  | 0.10 | 0.59 | 0.95  | 0.96  | 0.09 | 0.47 |
| Ni K | 7.05  | 7.88  | 0.22 | 3.45 | 8.95  | 9.00  | 0.20 | 4.15 |
| Cu K | 5.08  | 5.94  | 0.22 | 2.40 | 5.90  | 6.19  | 0.20 | 2.64 |
| Pb M | 19.18 | 24.54 | 0.48 | 3.04 | 23.08 | 26.82 | 0.44 | 3.51 |

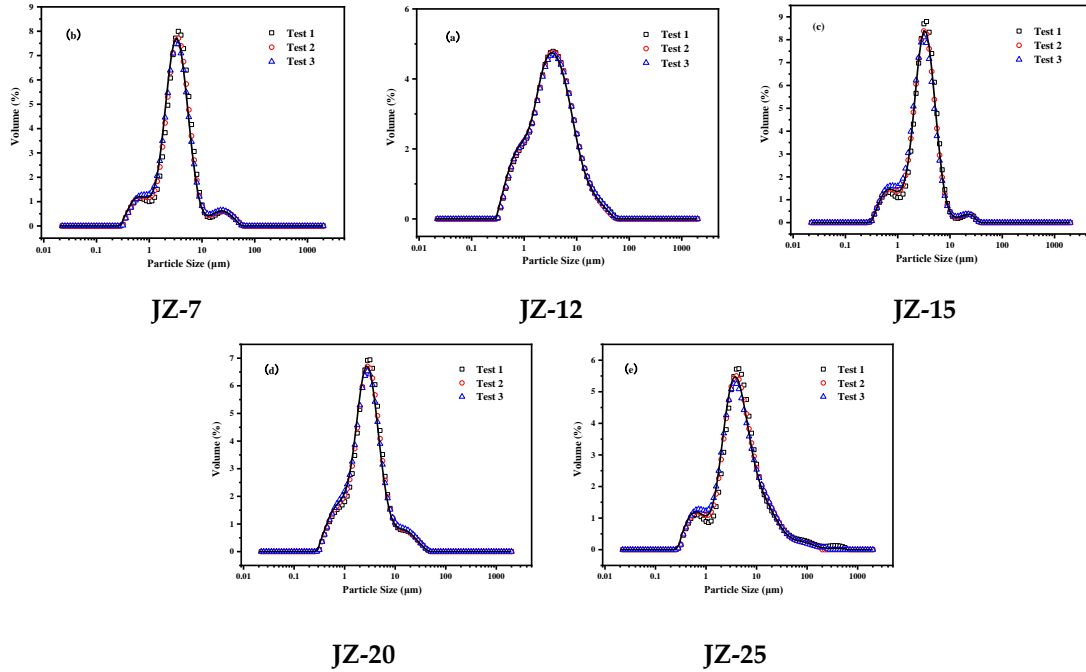

**Figure S3.** The particle size distribution curves for JZ propellant grains combustion under various pressures with repeated tests.

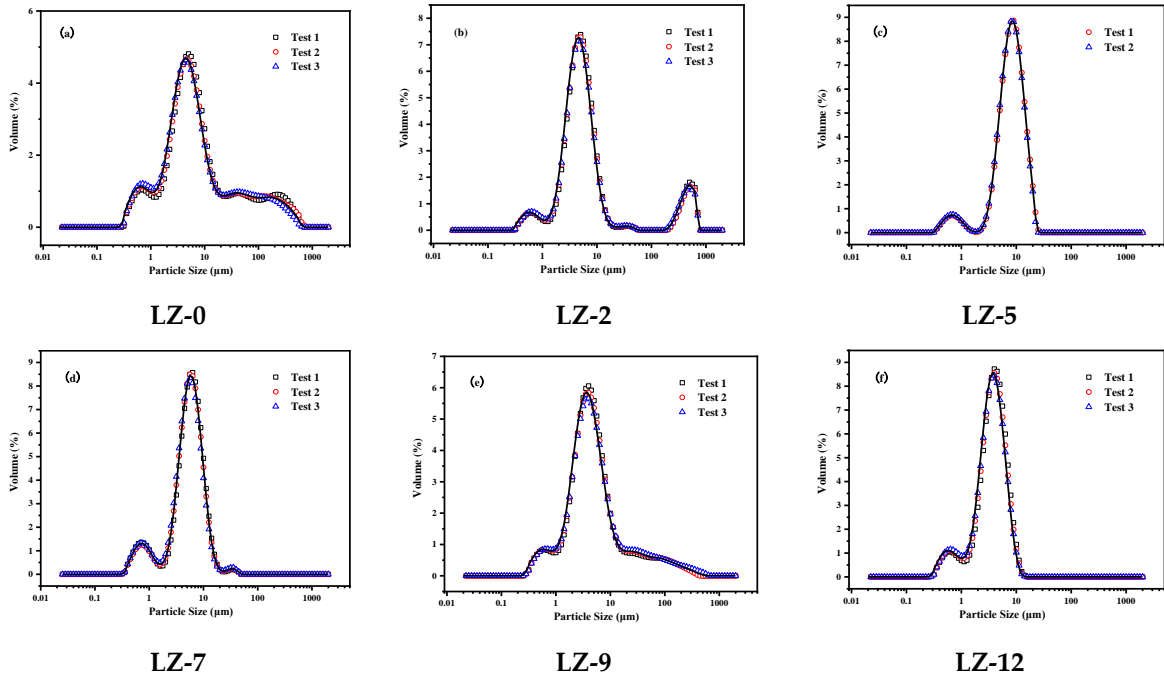

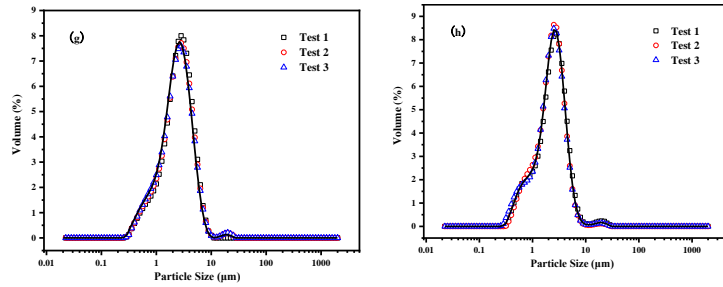

LZ-18

LZ-35

**Figure S4.** The particle size distribution curves for LZ propellant grains combustion under various pressures with repeated tests.

**Table S2.** A summary of the CCPs particle distributions for JZ propellant grains.

| Samples | Obscuration | Residual | Concentration | Span   | D[4,3] | Uniformity | SSA   | D[3, 2] - Surface weighted mean | d(0.1) | d(0.5) | d(0.9) |        |
|---------|-------------|----------|---------------|--------|--------|------------|-------|---------------------------------|--------|--------|--------|--------|
| JZ-7    | Test1       | 7.63     | 1.43          | 0.0027 | 3.157  | 5.045      | 1.06  | 3.03                            | 1.981  | 0.806  | 3.202  | 10.915 |
|         | Test2       | 7.6      | 1.204         | 0.0027 | 3.118  | 4.901      | 1.03  | 3.07                            | 1.951  | 0.792  | 3.167  | 10.663 |
|         | Test3       | 7.58     | 1.317         | 0.0027 | 3.188  | 4.998      | 1.06  | 3.09                            | 1.944  | 0.785  | 3.169  | 10.887 |
|         | mean        | 7.6      | 1.317         | 0.0027 | 3.154  | 4.981      | 1.05  | 3.06                            | 1.959  | 0.794  | 3.179  | 10.819 |
| JZ-12   | Test1       | 8.88     | 1.261         | 0.0034 | 1.879  | 4.654      | 0.801 | 2.68                            | 2.239  | 1.104  | 3.293  | 7.292  |
|         | Test2       | 8.9      | 1.043         | 0.0033 | 2.005  | 4.569      | 0.847 | 2.79                            | 2.153  | 1.025  | 3.144  | 7.33   |
|         | Test3       | 8.91     | 1.127         | 0.0032 | 2.098  | 4.541      | 0.882 | 2.84                            | 2.114  | 0.995  | 3.061  | 7.418  |
|         | mean        | 8.9      | 1.144         | 0.0033 | 1.992  | 4.588      | 0.842 | 2.77                            | 2.167  | 1.035  | 3.167  | 7.343  |
| JZ-15   | Test1       | 8.53     | 1.845         | 0.003  | 1.61   | 3.596      | 0.571 | 2.93                            | 2.045  | 0.95   | 3.03   | 5.827  |
|         | Test2       | 8.56     | 1.801         | 0.0029 | 1.693  | 3.466      | 0.61  | 3.1                             | 1.933  | 0.87   | 2.851  | 5.697  |
|         | Test3       | 8.57     | 1.749         | 0.0028 | 1.746  | 3.386      | 0.633 | 3.22                            | 1.866  | 0.831  | 2.745  | 5.623  |
|         | mean        | 8.55     | 1.798         | 0.0029 | 1.685  | 3.483      | 0.606 | 3.08                            | 1.945  | 0.875  | 2.876  | 5.721  |
| JZ-20   | Test1       | 9.3      | 1.125         | 0.0031 | 2.385  | 4.004      | 0.87  | 3.15                            | 1.906  | 0.865  | 2.742  | 7.403  |
|         | Test2       | 9.31     | 1.177         | 0.003  | 2.517  | 3.937      | 0.906 | 3.25                            | 1.846  | 0.83   | 2.646  | 7.492  |
|         | Test3       | 9.31     | 1.073         | 0.003  | 2.646  | 3.937      | 0.941 | 3.31                            | 1.814  | 0.813  | 2.592  | 7.671  |
|         | mean        | 9.31     | 1.125         | 0.003  | 2.512  | 3.959      | 0.905 | 3.24                            | 1.855  | 0.834  | 2.661  | 7.519  |
| JZ-25   | Test1       | 8.37     | 0.608         | 0.0039 | 4.079  | 12.349     | 2.27  | 2.35                            | 2.556  | 1.099  | 4.382  | 18.972 |
|         | Test2       | 8.48     | 0.634         | 0.0037 | 3.853  | 8.077      | 1.45  | 2.51                            | 2.386  | 0.982  | 4.055  | 16.606 |
|         | Test3       | 8.53     | 0.627         | 0.0036 | 4.041  | 8.274      | 1.59  | 2.61                            | 2.301  | 0.926  | 3.903  | 16.696 |
|         | mean        | 8.46     | 0.623         | 0.0037 | 3.967  | 9.567      | 1.78  | 2.49                            | 2.41   | 0.99   | 4.116  | 17.317 |

**Table S3.** Particle distribution of LZ propellant grains combustion products.

| Samples | Residual | Concentration | Span   | D [4, 3] - Volume weighted mean | Uniformity | SSA   | D [3, 2] - Surface weighted mean | d (0.1) | d (0.5) | d (0.9) |         |
|---------|----------|---------------|--------|---------------------------------|------------|-------|----------------------------------|---------|---------|---------|---------|
| LZ-0    | Test 1   | 0.570         | 0.0047 | 20.455                          | 36.345     | 5.91  | 1.98                             | 3.024   | 1.235   | 5.654   | 116.882 |
|         | Test 2   | 0.559         | 0.0044 | 19.948                          | 35.469     | 6.22  | 2.14                             | 2.804   | 1.075   | 5.274   | 106.282 |
|         | Test 3   | 0.585         | 0.0042 | 16.814                          | 28.885     | 5.31  | 2.26                             | 2.65    | 0.988   | 4.97    | 84.558  |
|         | mean     | 0.571         | 0.0044 | 18.859                          | 33.566     | 5.83  | 2.13                             | 2.818   | 1.084   | 5.298   | 101.003 |
| LZ-2    | Test 1   | 0.764         | 0.0058 | 63.939                          | 56.990     | 11.00 | 1.77                             | 3.390   | 2.092   | 4.886   | 314.492 |
|         | Test 2   | 0.923         | 0.0057 | 58.168                          | 53.230     | 10.60 | 1.84                             | 3.253   | 1.975   | 4.753   | 278.462 |
|         | Test 3   | 0.908         | 0.0057 | 60.503                          | 54.282     | 10.90 | 1.86                             | 3.22    | 1.921   | 4.723   | 287.694 |
|         | mean     | 0.865         | 0.0057 | 61.074                          | 54.834     | 10.80 | 1.83                             | 3.286   | 1.995   | 4.788   | 294.406 |
| LZ-5    | Test 1   | 1.694         | 0.0079 | 1.442                           | 9.195      | 0.459 | 0.85                             | 7.070   | 4.15    | 7.956   | 15.624  |
|         | Test 2   | 1.53          | 0.0064 | 1.382                           | 8.291      | 0.435 | 1.38                             | 4.361   | 3.568   | 7.7     | 14.213  |
|         | Test 3   | 1.618         | 0.0063 | 1.385                           | 8.043      | 0.436 | 1.43                             | 4.203   | 3.409   | 7.5     | 13.797  |
|         | mean     | 1.614         | 0.0069 | 1.392                           | 8.510      | 0.445 | 1.22                             | 4.929   | 3.761   | 7.714   | 14.498  |
| LZ-7    | Test 1   | 1.946         | 0.0043 | 1.698                           | 5.224      | 0.514 | 2.33                             | 2.573   | 0.947   | 4.72    | 8.962   |
|         | Test 2   | 2.040         | 0.0043 | 1.686                           | 5.153      | 0.527 | 2.31                             | 2.600   | 1.069   | 4.578   | 8.790   |
|         | Test 3   | 1.969         | 0.0041 | 1.732                           | 5.000      | 0.546 | 2.42                             | 2.477   | 0.96    | 4.387   | 8.557   |
|         | mean     | 1.985         | 0.0042 | 1.708                           | 5.126      | 0.530 | 2.35                             | 2.549   | 0.986   | 4.561   | 8.777   |
| LZ-9    | Test 1   | 0.452         | 0.0047 | 6.834                           | 14.787     | 3.060 | 2.28                             | 2.637   | 1.358   | 4.072   | 29.182  |

|       |        |       |        |       |        |       |      |       |       |       |        |
|-------|--------|-------|--------|-------|--------|-------|------|-------|-------|-------|--------|
|       | Test 2 | 0.453 | 0.0046 | 7.076 | 14.091 | 2.92  | 2.30 | 2.604 | 1.295 | 4.037 | 29.859 |
|       | Test3  | 0.542 | 0.0047 | 8.194 | 17.396 | 3.710 | 2.29 | 2.617 | 1.276 | 4.073 | 34.649 |
|       | mean   | 0.482 | 0.0047 | 7.373 | 15.425 | 3.230 | 2.29 | 2.619 | 1.308 | 4.06  | 31.245 |
| LZ-12 | Test 1 | 0.650 | 0.0036 | 1.496 | 3.898  | 0.453 | 2.54 | 2.362 | 1.321 | 3.619 | 6.737  |
|       | Test 2 | 0.702 | 0.0035 | 1.545 | 3.739  | 0.465 | 2.66 | 2.259 | 1.168 | 3.461 | 6.517  |
|       | Test 3 | 0.871 | 0.0035 | 1.569 | 3.637  | 0.470 | 2.73 | 2.195 | 1.087 | 3.364 | 6.366  |
|       | mean   | 0.741 | 0.0035 | 1.541 | 3.758  | 0.464 | 2.64 | 2.270 | 1.18  | 3.481 | 6.544  |
| LZ-18 | Test 1 | 1.482 | 0.0028 | 1.586 | 2.643  | 0.485 | 3.45 | 1.740 | 0.873 | 2.402 | 4.683  |
|       | Test 2 | 1.618 | 0.0027 | 1.654 | 2.713  | 0.548 | 3.53 | 1.698 | 0.836 | 2.345 | 4.714  |
|       | Test 3 | 1.583 | 0.0027 | 1.675 | 2.673  | 0.559 | 3.61 | 1.663 | 0.812 | 2.298 | 4.661  |
|       | mean   | 1.561 | 0.0027 | 1.638 | 2.676  | 0.53  | 3.53 | 1.700 | 0.839 | 2.349 | 4.685  |
| LZ-35 | Test 1 | 1.619 | 0.0029 | 1.607 | 2.653  | 0.562 | 3.70 | 1.623 | 0.757 | 2.279 | 4.419  |
|       | Test 2 | 1.744 | 0.0028 | 1.504 | 2.425  | 0.503 | 3.74 | 1.605 | 0.785 | 2.168 | 4.045  |
|       | Test 3 | 1.844 | 0.0028 | 1.568 | 2.410  | 0.527 | 4.00 | 1.501 | 0.703 | 2.132 | 4.047  |
|       | mean   | 1.736 | 0.0028 | 1.562 | 2.496  | 0.533 | 3.81 | 1.574 | 0.75  | 2.191 | 4.171  |

Notes: a), the weighted average of the particle size to the surface area; b), the weighted average of the particle size to the volume. c), particles whose diameter is equal to or less than the value of D(0.1), and the sum of the volume fractions of which accounts for ten percent ; it is the same for d) and e); SSA, specific surface area.

**Table S4.** Chemical compositions of the CCPs of JZ propellants at various pressures.

| Chemicals (volume %) |    |          |                                                    |                   |                   |                   |                                |    |                  |
|----------------------|----|----------|----------------------------------------------------|-------------------|-------------------|-------------------|--------------------------------|----|------------------|
| Samples              | Cu | Pb(OH)Cl | Pb <sub>2</sub> Cl <sub>2</sub> (CO <sub>3</sub> ) | Al <sub>2</sub> O | AlCu <sub>3</sub> | AlCu <sub>4</sub> | Al <sub>2</sub> O <sub>3</sub> | C  | SiO <sub>2</sub> |
| JZ-7                 | 46 | 36       | -                                                  | 18                | -                 | -                 | -                              | -  | -                |
| JZ-12                | 43 | 16       | -                                                  | -                 | 14                | -                 | -                              | -  | 27               |
| JZ-15                | 34 | 34       | -                                                  | -                 | -                 | 32                | -                              | -  | -                |
| JZ-20                | 37 | -        | 50                                                 | -                 | -                 | -                 | 13                             | -  | -                |
| JZ-25                | -  | -        | 29                                                 | -                 | 25                | -                 | -                              | 46 | -                |

**Table S5.** Chemical compositions of the CCPs of LZ propellants at various pressures.

| Samples                                                                                             | LZ-0 | LZ-2 | LZ-5 | LZ-7 | LZ-9 | LZ-12 | LZ-18 | LZ-35 |
|-----------------------------------------------------------------------------------------------------|------|------|------|------|------|-------|-------|-------|
| Cu                                                                                                  | -    | 40   | -    | -    | -    | -     | -     | -     |
| CuO                                                                                                 | 5    | -    | -    | -    | -    | -     | -     | -     |
| Cu <sub>3</sub> N <sub>1</sub>                                                                      | -    | -    | 18   | 26   | -    | -     | -     | -     |
| Cu <sub>1.8</sub> S                                                                                 | -    | -    | -    | -    | -    | -     | 21    | -     |
| C <sub>12</sub> H <sub>27</sub> N <sub>3</sub> O <sub>6</sub> •CuCl <sub>2</sub> •2H <sub>2</sub> O | -    | -    | -    | -    | 12   | -     | -     | -     |
| Cu(NO <sub>3</sub> ) <sub>2</sub> •3H <sub>2</sub> O                                                | -    | -    | -    | -    | -    | -     | -     | 13    |
| Pb(OH)Cl                                                                                            | 34   | 27   | 31   | -    | 47   | -     | -     | 51    |
| Pb <sub>2</sub> SO <sub>5</sub>                                                                     | -    | -    | -    | 27   | -    | -     | -     | -     |
| 2Pb(CO <sub>3</sub> )•Pb(OH) <sub>2</sub>                                                           | -    | -    | -    | -    | -    | 32    | -     | -     |
| Pb <sub>4</sub> O <sub>3</sub> Cl <sub>2</sub> •H <sub>2</sub> O                                    | -    | -    | -    | -    | -    | -     | 23    | -     |
| Al <sub>2</sub> O <sub>3</sub>                                                                      | 37   | -    | 29   | 23   | -    | -     | -     | -     |
| AlNi <sub>3</sub> C <sub>0.5</sub>                                                                  | -    | 35   | -    | -    | -    | -     | -     | -     |
| HAIO <sub>10</sub> Si <sub>4</sub>                                                                  | -    | -    | -    | -    | 30   | -     | -     | -     |
| AlCu <sub>4</sub>                                                                                   | -    | -    | -    | -    | -    | 20    | -     | -     |
| AlN                                                                                                 | -    | -    | -    | -    | -    | -     | 27    | -     |
| CH <sub>18</sub> AlN <sub>3</sub> O <sub>14</sub> S <sub>2</sub>                                    | -    | -    | -    | -    | -    | -     | -     | 11    |
| Ni                                                                                                  | 30   | -    | -    | -    | -    | -     | 29    | -     |
| Pb <sub>2</sub> Ni(NO <sub>2</sub> ) <sub>6</sub>                                                   | -    | -    | 19   | -    | -    | -     | -     | -     |
| (NH <sub>4</sub> ) <sub>2</sub> Ni(SO <sub>4</sub> ) <sub>2</sub> •6H <sub>2</sub> O                | -    | -    | -    | 24   | -    | -     | -     | -     |
| C <sub>2</sub> H <sub>2</sub> NiO <sub>4</sub> •2H <sub>2</sub> O                                   | -    | -    | -    | -    | 11   | -     | -     | -     |
| NiO                                                                                                 | -    | -    | -    | -    | -    | 20    | -     | 25    |
| C                                                                                                   | -    | -    | -    | -    | -    | 28    | -     | -     |
